# Supplementary material for: Catalytic Properties of Two Complexes of chromium(III) and cobalt(II) with Nitrilotriacetate, Dipicolinate, and 4-Acetylpyridine
Source: MDPI journal article supplement (doi:10.3390/ma16093308), 2023-04-23
Supplement: s1 [file s1]

# Catalytic Properties of Two Complexes of chromium(III) and cobalt(II) with Nitrilotriacetate, Dipicolinate, and 4-Acetylpyridine

Jacek Malinowski <sup>1</sup>, Joanna Drzeżdżon <sup>1,\*</sup>, Katarzyna N. Jarzemska <sup>2</sup>, Radosław Kamiński <sup>2</sup>,  
Przemysław Rybiński <sup>3</sup>, Barbara Gawdzik <sup>3</sup> and Dagmara Jacewicz <sup>1</sup>

<sup>1</sup> Faculty of Chemistry, University of Gdansk (Gdańsk), Wita Stwosza 63, 80-308 Gdansk, Poland

<sup>2</sup> Department of Chemistry, University of Warsaw, Żwirki i Wigury 101, 02-089 Warsaw, Poland

<sup>3</sup> Institute of Chemistry, Jan Kochanowski University, Uniwersytecka 7, 25-406 Kielce, Poland

\* Correspondence: joanna.drzezdzon@ug.edu.pl

**Table S1.** Selected X-ray data collection, processing and refinement parameters for crystal structure (**1**).

|                                                          |                                                                                                       |
|----------------------------------------------------------|-------------------------------------------------------------------------------------------------------|
| Moiety formula                                           | [C <sub>6</sub> H <sub>8</sub> CoNO <sub>7</sub> ] <sup>−</sup> , K <sup>+</sup> , 2 H <sub>2</sub> O |
| Moiety formula mass, $M_r$ / a.u.                        | 340.2                                                                                                 |
| Crystal system                                           | monoclinic                                                                                            |
| Space group                                              | $P2_1/n$ (No. 14)                                                                                     |
| $Z$                                                      | 4                                                                                                     |
| $F_{000}$                                                | 684                                                                                                   |
| Crystal color & shape                                    | pink plate                                                                                            |
| Crystal size / mm <sup>3</sup>                           | 0.04×0.12×0.18                                                                                        |
| $T$ / K                                                  | 100                                                                                                   |
| $a$ / Å                                                  | 7.095(2)                                                                                              |
| $b$ / Å                                                  | 9.974(2)                                                                                              |
| $c$ / Å                                                  | 16.223(3)                                                                                             |
| $\alpha$ / Å                                             | 90                                                                                                    |
| $\beta$ / Å                                              | 91.21(3)                                                                                              |
| $\gamma$ / Å                                             | 90                                                                                                    |
| $V$ / Å <sup>3</sup>                                     | 1147.7(5)                                                                                             |
| $d_{\text{calc}}$ / g·cm <sup>−3</sup>                   | 1.948                                                                                                 |
| $\theta$ range                                           | 5.21°–76.09°                                                                                          |
| Absorption coefficient, $\mu$ / mm <sup>−1</sup>         | 15.424                                                                                                |
| No. of reflections collected / unique                    | 14542 / 2394                                                                                          |
| $R_{\text{int}}$                                         | 5.89%                                                                                                 |
| No. of reflections with                                  | 2245                                                                                                  |
| $I > 3\sigma(I)$                                         |                                                                                                       |
| No. of parameters / restraints / constraints             | 181 / 6 / 30                                                                                          |
| $R[F]$ ( $I > 3\sigma(I)$ )                              | 2.70%                                                                                                 |
| $R[F]$ (all data)                                        | 2.93%                                                                                                 |
| $\rho_{\text{res}}^{\text{min/max}}$ / e·Å <sup>−3</sup> | −0.34 / +0.36                                                                                         |
| CCDC code                                                | 2116382                                                                                               |

**Table S2.** Selected X-ray data collection, processing and refinement parameters for crystal structure (2).

|                                                    |                                            |
|----------------------------------------------------|--------------------------------------------|
| Moiety formula                                     | $C_7H_7ClCrNO_6$ , $[C_7H_8NO]^+$ , $Cl^-$ |
| Moiety formula mass, $M_r$ / a.u.                  | 446.18                                     |
| Crystal system                                     | orthorhombic                               |
| Space group                                        | $P2_12_12_1$ (No. 19)                      |
| $Z$                                                | 4                                          |
| $F_{000}$                                          | 908                                        |
| Crystal color & shape                              | blue-green cut crystal                     |
| Crystal size / $mm^3$                              | 0.03×0.06×0.09                             |
| $T$ / K                                            | 100                                        |
| $a$ / Å                                            | 33.623(7)                                  |
| $b$ / Å                                            | 8.511(2)                                   |
| $c$ / Å                                            | 6.099(2)                                   |
| $\alpha$ / Å                                       | 90                                         |
| $\beta$ / Å                                        | 90                                         |
| $\gamma$ / Å                                       | 90                                         |
| $V$ / Å <sup>3</sup>                               | 1745.4(8)                                  |
| $d_{calc}$ / $g \cdot cm^{-3}$                     | 1.698                                      |
| $\theta$ range                                     | 2.63°–76.23°                               |
| Absorption coefficient, $\mu$ / $mm^{-1}$          | 8.599                                      |
| No. of reflections collected / unique              | 23856 / 3647                               |
| $R_{int}$                                          | 11.08%                                     |
| No. of reflections with<br>$I > 3\sigma(I)$        | 2975                                       |
| No. of parameters / restraints / constraints       | 247 / 4 / 48                               |
| $R[F]$ ( $I > 3\sigma(I)$ )                        | 4.33%                                      |
| $R[F]$ (all data)                                  | 5.74%                                      |
| $\rho_{res}^{min/max}$ / $e \cdot \text{\AA}^{-3}$ | −0.42 / +0.42                              |
| CCDC code                                          | 2116383                                    |

**Table S3.** Selected hydrogen bonds (HBs) present in the crystal structure of **(1)**. Abbreviations:  $d$  – distance,  $\theta$  – angle, D – HB donor, A – HB acceptor. Symmetry transformations are omitted for clarity (they are present in the CIF files).

| <i>Interaction</i> | $d_{\text{D-H}} / \text{\AA}$ | $d_{\text{H}\cdots\text{A}} / \text{\AA}$ | $d_{\text{D}\cdots\text{A}} / \text{\AA}$ | $\theta_{\text{D-H}\cdots\text{A}} / ^\circ$ |
|--------------------|-------------------------------|-------------------------------------------|-------------------------------------------|----------------------------------------------|
| O7–H6 $\cdots$ O8  | 0.82(2)                       | 1.972(19)                                 | 2.777(2)                                  | 167(2)                                       |
| O7–H7 $\cdots$ O9  | 0.82(2)                       | 1.885(18)                                 | 2.689(2)                                  | 167(2)                                       |
| O8–H8 $\cdots$ O4  | 0.82(1)                       | 1.928(15)                                 | 2.745(2)                                  | 174(3)                                       |
| O8–H9 $\cdots$ O2  | 0.820(3)                      | 2.147(10)                                 | 2.927(3)                                  | 159(3)                                       |
| O9–H10 $\cdots$ O2 | 0.82(2)                       | 2.00(2)                                   | 2.823(2)                                  | 178(2)                                       |
| O9–H11 $\cdots$ O3 | 0.82(2)                       | 1.99(2)                                   | 2.785(2)                                  | 164(2)                                       |

**Table S4.** Selected hydrogen bonds (HBs) present in the crystal structure of **(2)**. Abbreviations:  $d$  – distance,  $\theta$  – angle, D – HB donor, A – HB acceptor. Symmetry transformations are omitted for clarity (they are present in the CIF files).

| <i>Interaction</i>  | $d_{\text{D-H}} / \text{\AA}$ | $d_{\text{H}\cdots\text{A}} / \text{\AA}$ | $d_{\text{D}\cdots\text{A}} / \text{\AA}$ | $\theta_{\text{D-H}\cdots\text{A}} / ^\circ$ |
|---------------------|-------------------------------|-------------------------------------------|-------------------------------------------|----------------------------------------------|
| O5–H15 $\cdots$ O4  | 0.82(4)                       | 1.87(4)                                   | 2.689(5)                                  | 172(6)                                       |
| O5–H16 $\cdots$ Cl2 | 0.82(4)                       | 2.22(4)                                   | 3.031(3)                                  | 169(5)                                       |
| O6–H17 $\cdots$ O2  | 0.82(4)                       | 1.93(4)                                   | 2.744(5)                                  | 171(5)                                       |
| O6–H18 $\cdots$ Cl2 | 0.82(3)                       | 2.23(3)                                   | 3.033(4)                                  | 168(5)                                       |
| N2–H19 $\cdots$ Cl2 | 0.87                          | 2.36                                      | 3.192(4)                                  | 160.93                                       |

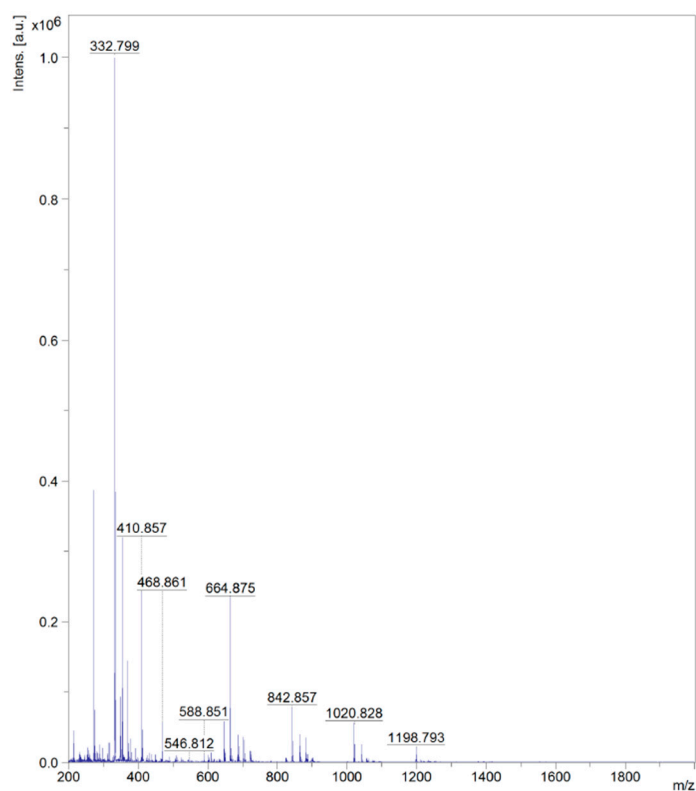

**Figure S1.** The mass spectrum of the 2-chloro-2-propen-1-ol oligomerization product (CoNTA).

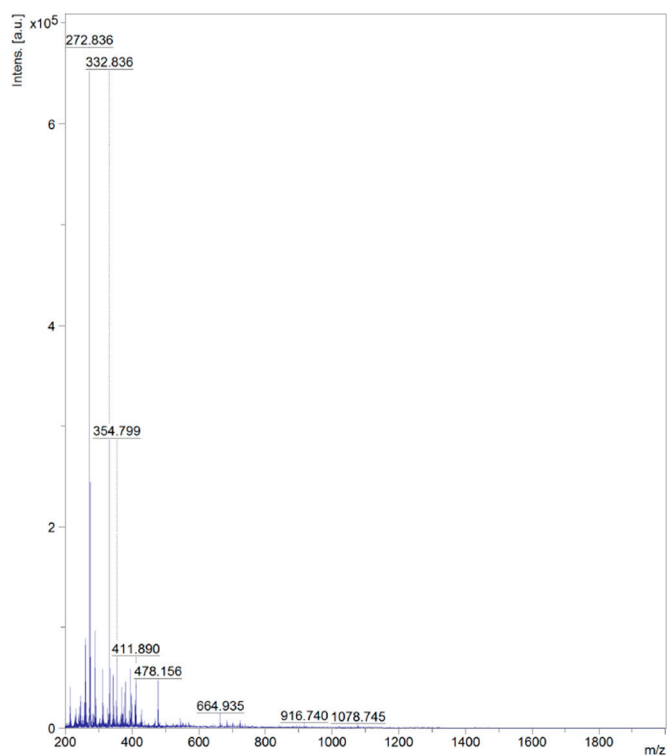

**Figure S2.** The mass spectrum of the 2-propen-1-ol oligomerization product (CoNTA).

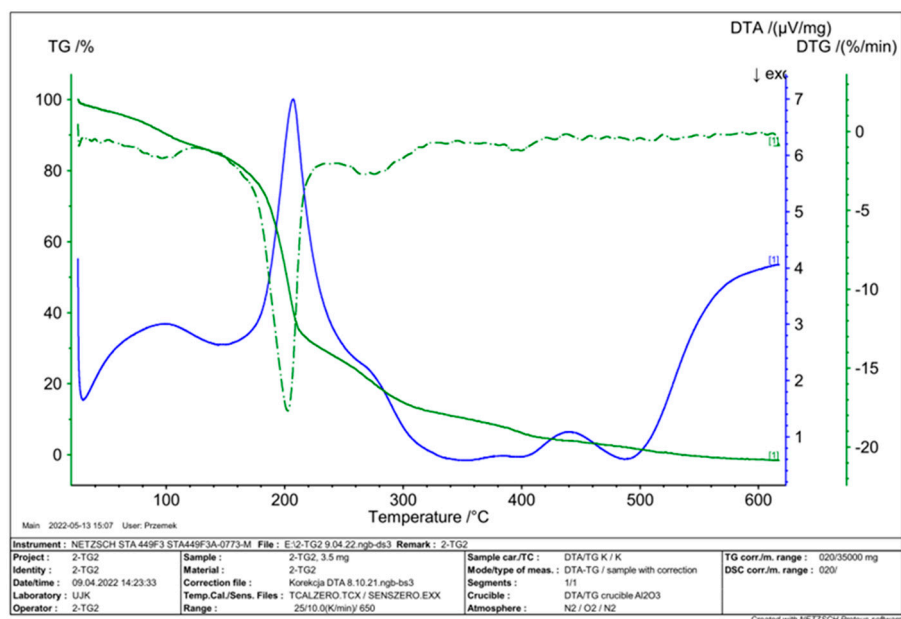

Figure S3. Thermal decomposition of the poly(2-propan-1-ol) sample (CoNTA).

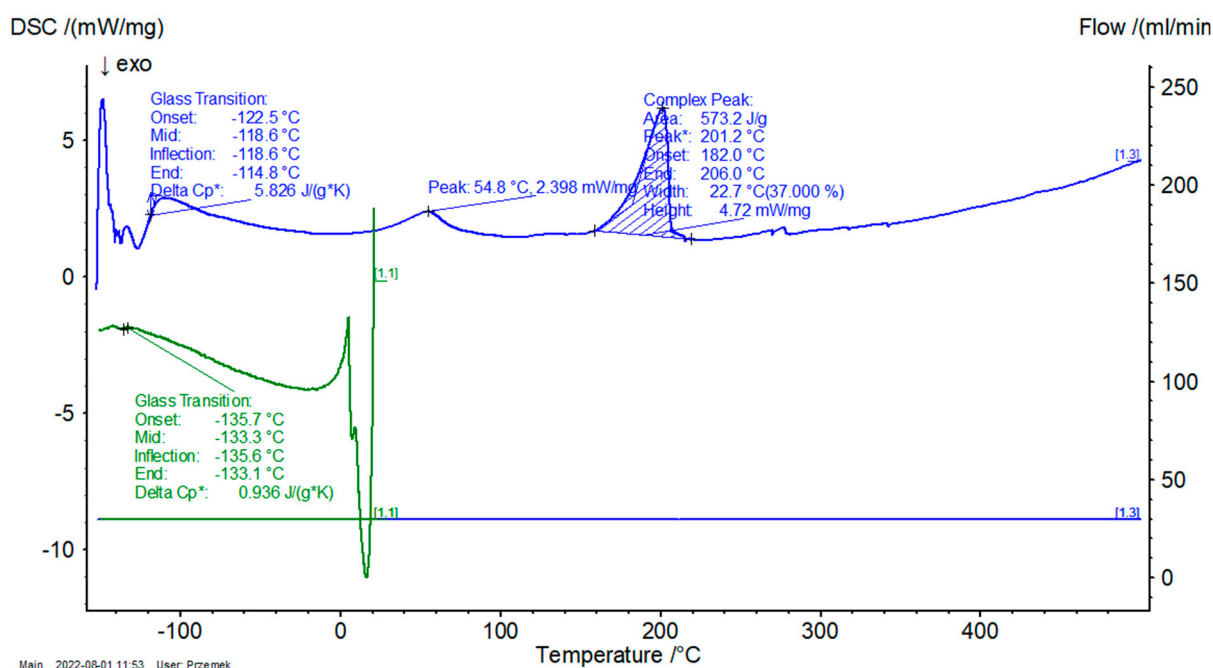

Figure S4. DSC analysis of the 2-chloro-2-propen-1-ol oligomers (CoNTA).

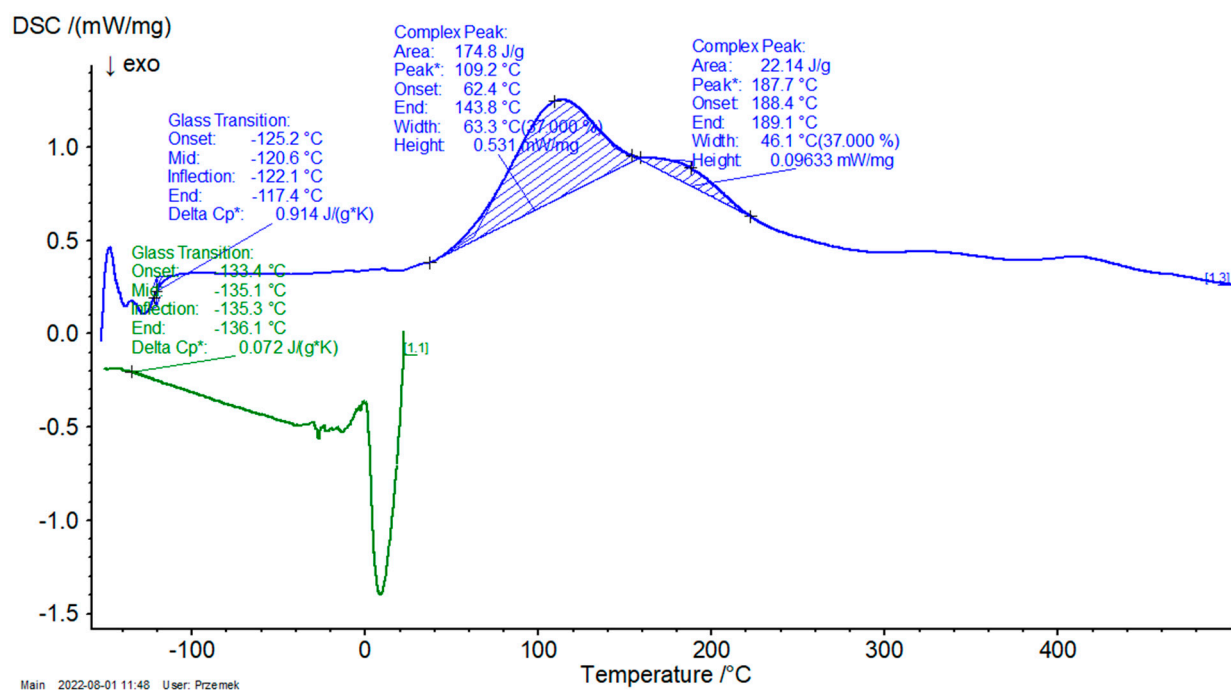

Figure S5. DSC analysis of the 2-propen-1-ol oligomers (CoNTA).

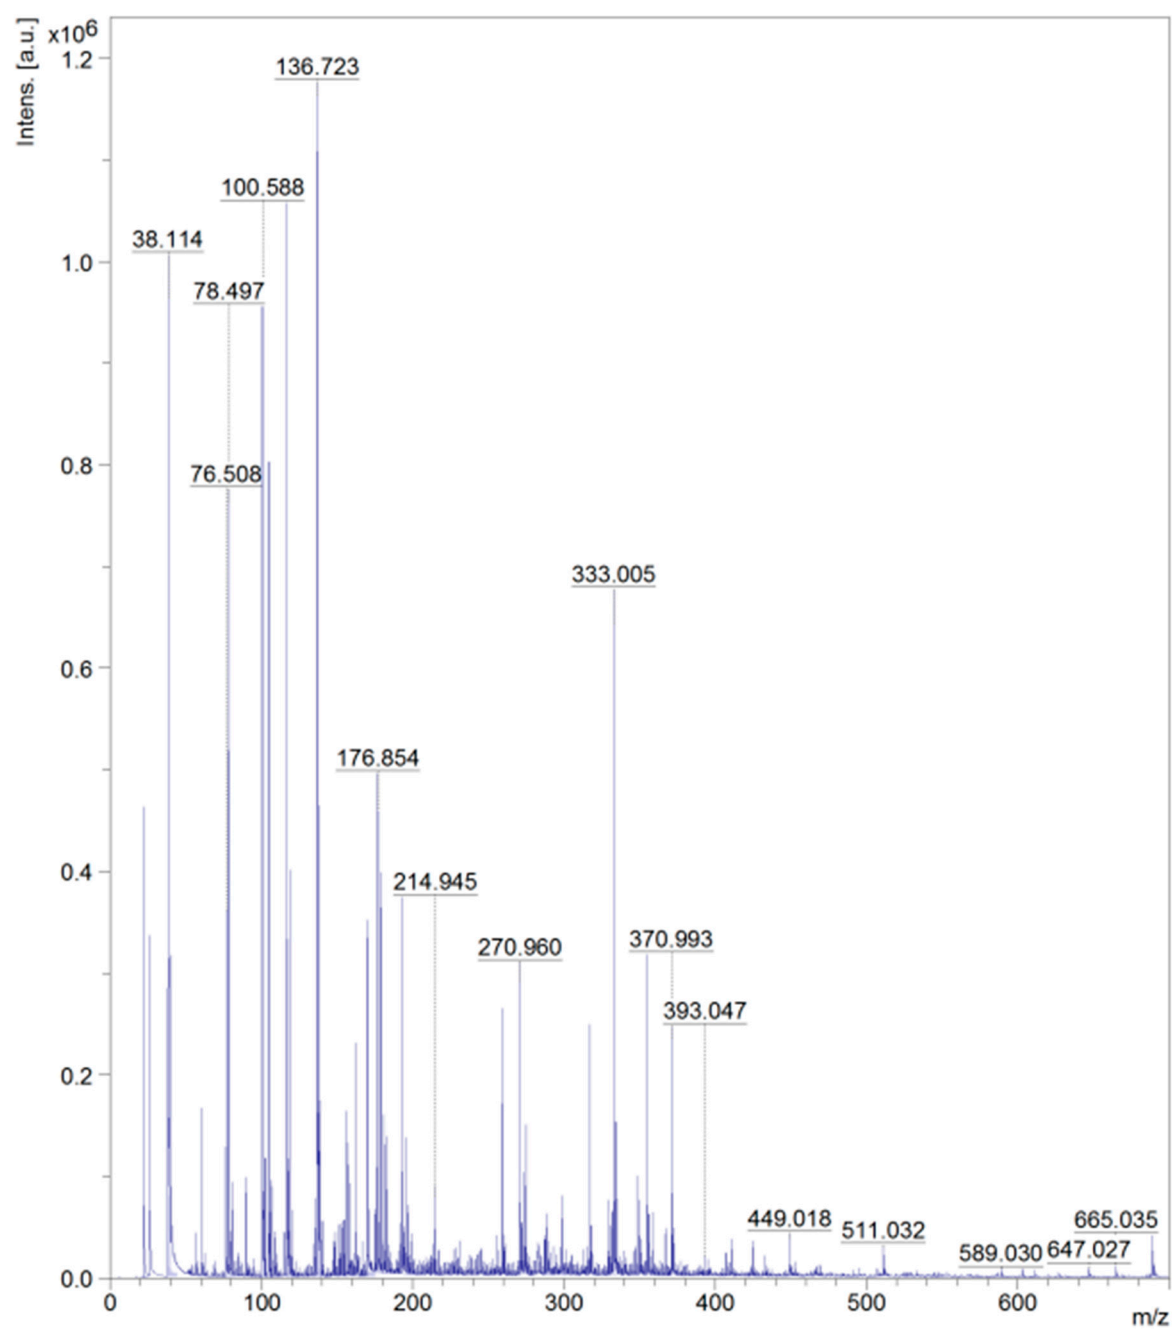

**Figure S6.** The mass spectrum of the 2-chloro-2-propen-1-ol oligomerization product (Crdipic4acetyl).



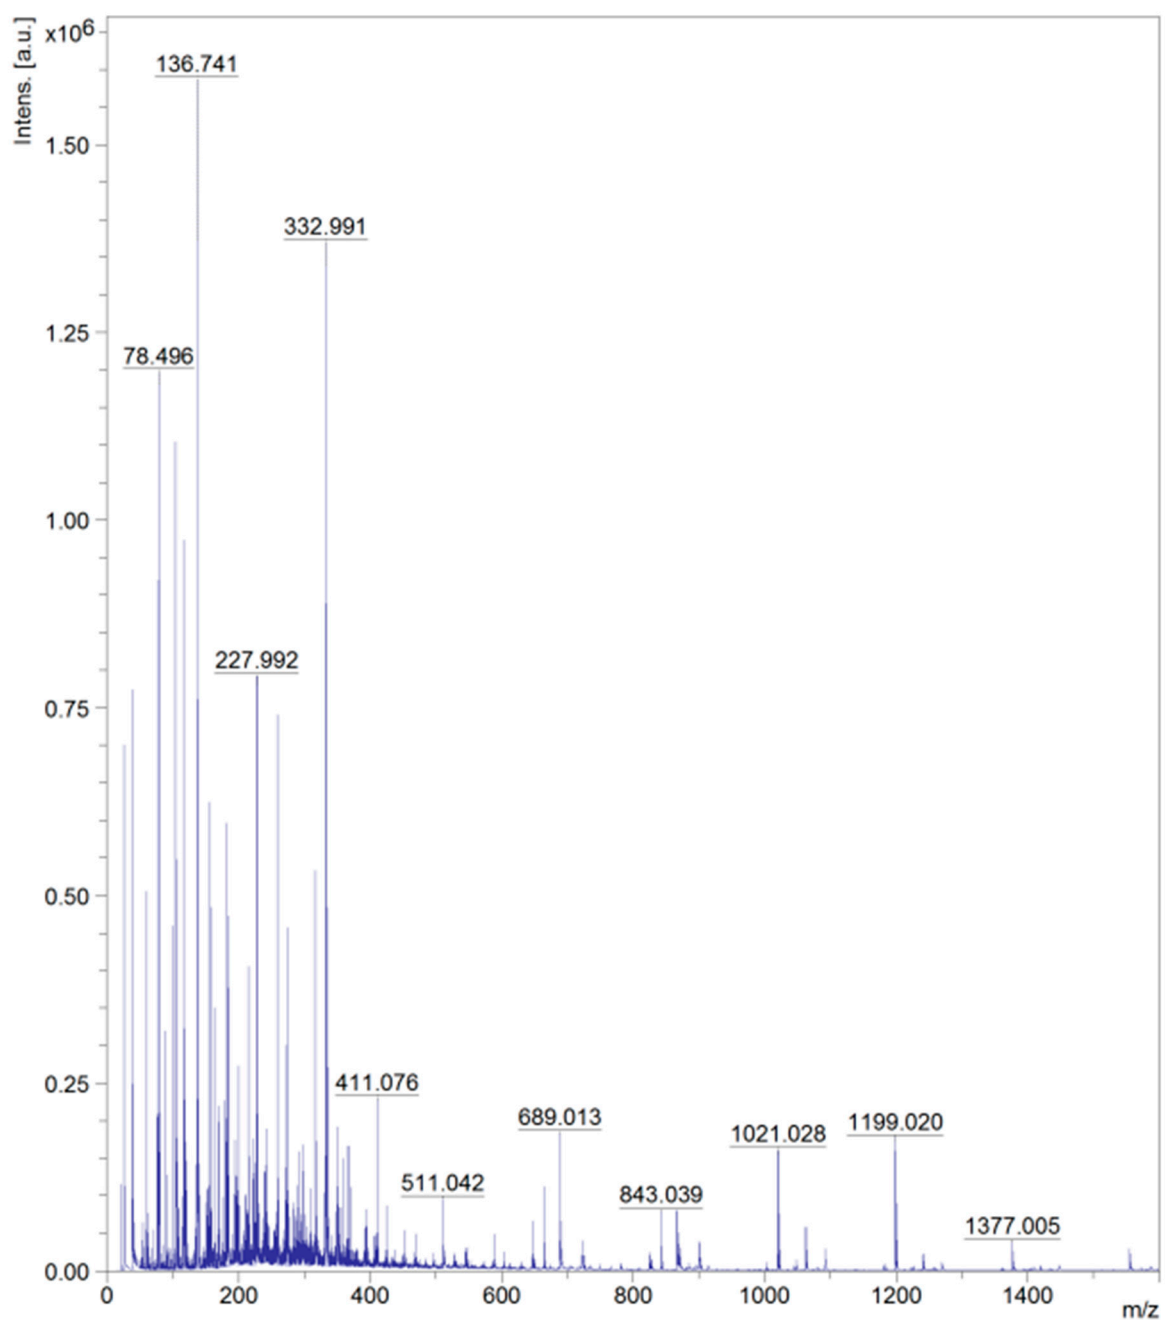

**Figure S7.** The mass spectrum of the 2-propen-1-ol oligomerization product (Crdipic4acetyl).

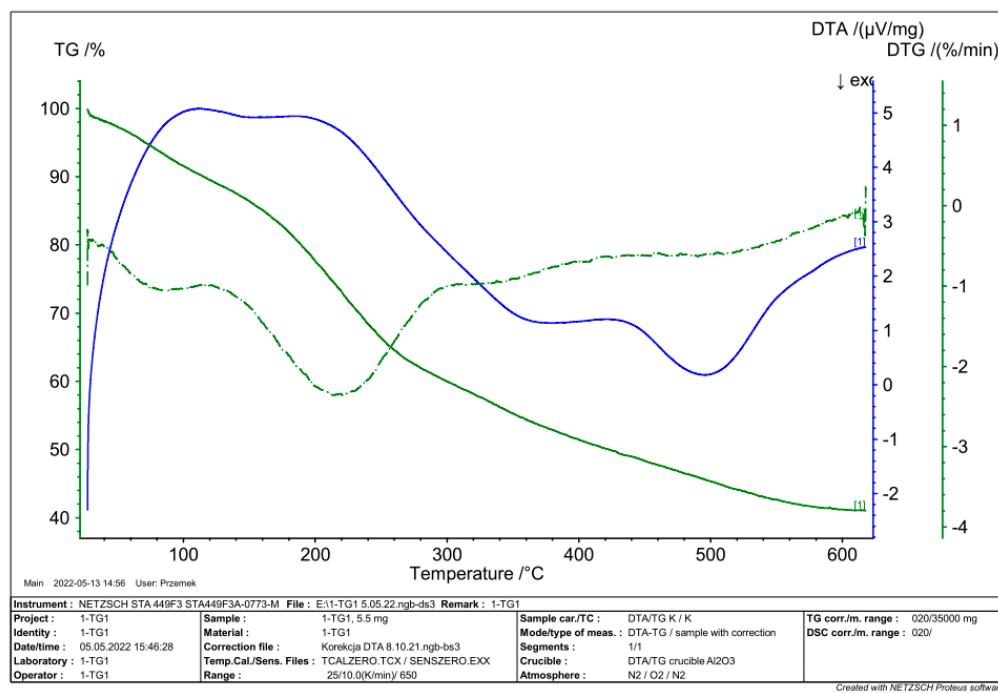

Figure S8. Thermal decomposition of the poly(2-chloro-2-propan-1-ol) sample (Crdipic4acetyl).

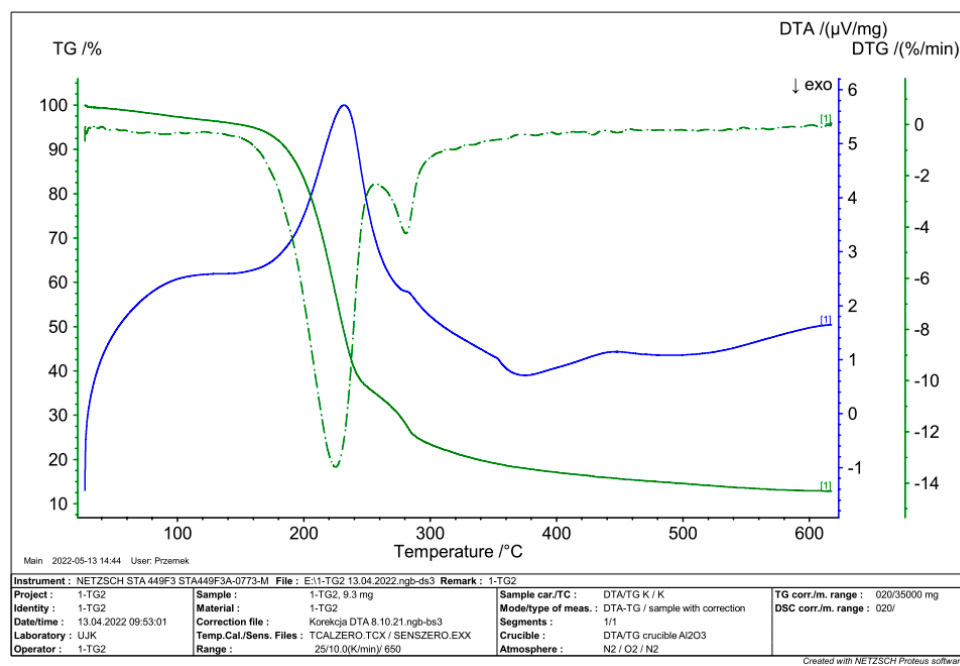

Figure S9. Thermal decomposition of the poly(2-propan-1-ol) sample (Crdipic4acetyl).

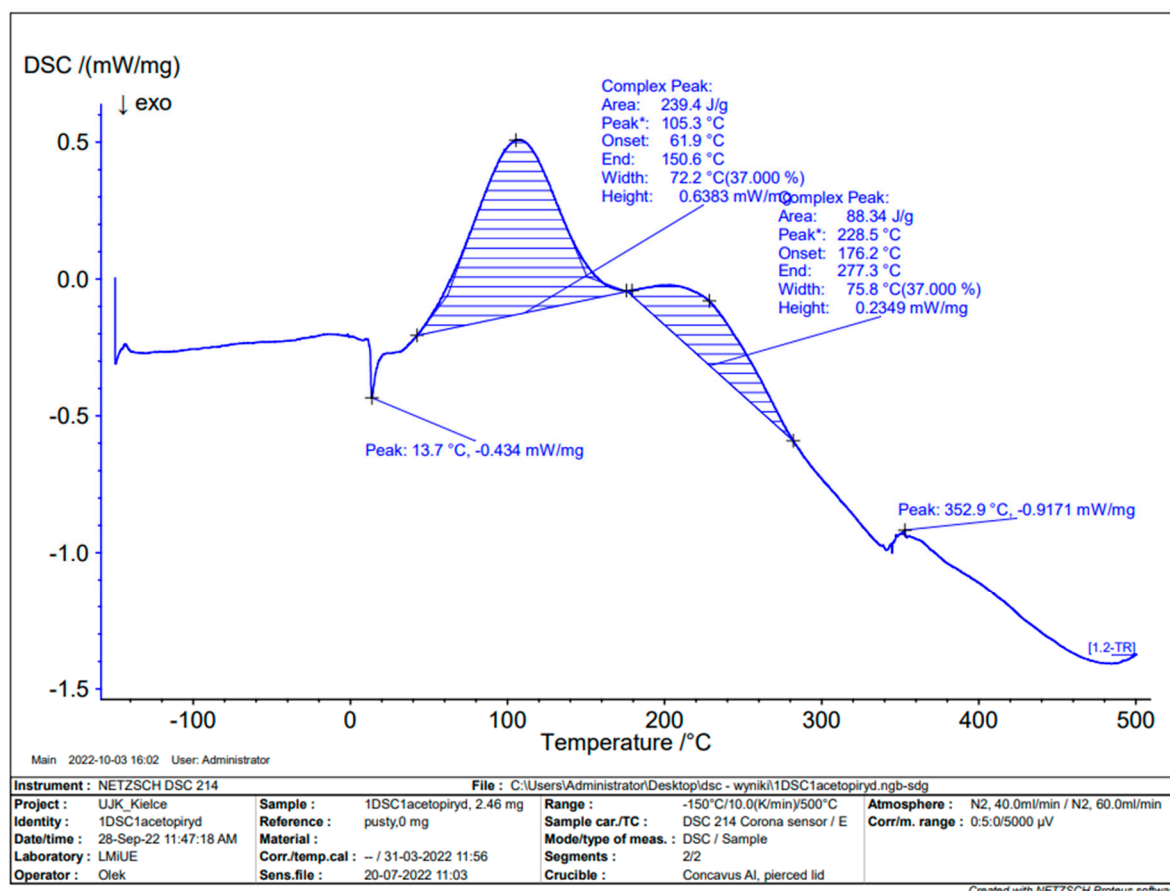

**Figure S10.** DSC analysis of the 2-chloro-2-propen-1-ol oligomers (**Crdipic4acetyl**).
